# Supplementary material
Source: publisher figshare collection journal article supplement (https://asha.figshare.com/articles/dataset/_/7927112)
Supplement: Supplementary file 2 [file 1]

**Supplemental Material S1.** Additional model results for the word form outcome.

| <b>Fixed effects</b>   | <b>Model E</b> |        |       | <b>Model F</b> |        |       |
|------------------------|----------------|--------|-------|----------------|--------|-------|
|                        | b              | 95% CI |       | b              | 95% CI |       |
| Group (DLD vs. TD)     | -1.38          | -2.59  | -0.16 | -1.69          | -3.23  | -0.16 |
| Condition (022 vs 000) | 2.69           | 1.41   | 3.96  | 2.69           | 1.41   | 3.96  |
| Time (1wk vs. 5min)    | -0.81          | -1.46  | -0.17 | -0.81          | -1.46  | -0.17 |
| Group × Time           | 0.81           | -0.10  | 1.73  | 0.81           | -0.10  | 1.72  |
| Cond. × Time           | 0.38           | -0.54  | 1.29  | 0.38           | -0.54  | 1.29  |
| Group × Cond.          | -0.50          | -2.30  | 1.30  | -0.50          | -2.30  | 1.30  |
| Group × Cond × Time    | -0.38          | -1.67  | 0.92  | -0.38          | -1.66  | 0.91  |
| PPVT-4                 |                |        |       | -0.02          | -0.08  | 0.03  |
| Mother’s education     |                |        |       | 0.06           | -0.31  | 0.43  |
| Intercept              | 2.69           | 1.83   | 3.54  | 4.31           | -3.24  | 11.87 |
| <b>Random effects</b>  | $\sigma^2$     |        |       | $\sigma^2$     |        |       |
| Condition              | 5.01           | 2.78   | 9.03  | 5.04           | 2.80   | 9.08  |
| Intercept              | 2.19           | 1.20   | 4.00  | 2.31           | 1.25   | 4.29  |

*Note.*  $N = 32$ , observations = 128. Effects with 95% confidence intervals (CI) that do not include 0 are statistically significant at  $\alpha = 0.05$ . The current models extend the models presented in Table 1 in the main text. Notably, the nonsignificant interactions across group, learning condition, and time indicate that the group effect in Model A in Table 1 does not differ across time and learning condition, and the learning condition effect does not differ across group or time. DLD = developmental language disorder; TD = typically developing; Cond. = condition; PPVT-4 = Peabody Picture Vocabulary Test–Fourth Edition (PPVT-4; Dunn & Dunn, 2007).

**Reference**

Dunn, L., & Dunn, D. (2007). *Peabody Picture Vocabulary Test–Fourth Edition (PPVT-4)*. Minneapolis, MN: AGS/Pearson.
