# Supplementary material
Source: publisher figshare collection journal article supplement (https://asha.figshare.com/articles/dataset/_/7927112)
Supplement: Supplementary file 3 [file 1]

**Supplemental Material S4.** Full event-related brain potential (ERP) within-condition mixed-effect models with region of interest (ROI) electrodes.

| <b>Fixed effects</b>        | <b>IR 300–500 ms</b> |        |       | <b>IR 500–700 ms</b> |        |       | <b>RRCR 300–500 ms</b> |        |       | <b>RRCR 500–700 ms</b> |        |       |
|-----------------------------|----------------------|--------|-------|----------------------|--------|-------|------------------------|--------|-------|------------------------|--------|-------|
|                             | b                    | 95% CI |       | b                    | 95% CI |       | b                      | 95% CI |       | b                      | 95% CI |       |
| Set <sup>1</sup>            | -2.18                | -3.02  | -1.34 | -2.26                | -3.16  | -1.37 | -1.27                  | -2.14  | -0.40 | -2.37                  | -3.32  | -1.41 |
| Group <sup>2</sup>          | 3.23                 | -1.48  | 7.93  | 3.27                 | -1.40  | 7.94  | 2.62                   | -1.33  | 6.58  | 3.41                   | -0.24  | 7.06  |
| Trial type <sup>3</sup>     | -0.78                | -1.92  | 0.37  | -0.17                | -1.38  | 1.05  | 2.09                   | 0.90   | 3.27  | 4.42                   | 3.12   | 5.72  |
| Group × Trial Type          | -0.15                | -1.77  | 1.47  | -0.62                | -2.34  | 1.09  | -0.62                  | -2.30  | 1.05  | -0.96                  | -2.80  | 0.88  |
| Electrode site <sup>4</sup> |                      |        |       |                      |        |       |                        |        |       |                        |        |       |
| PO3                         | -3.48                | -5.10  | -1.87 | -1.69                | -3.40  | 0.03  | -3.83                  | -5.51  | -2.16 | -1.97                  | -3.80  | -0.13 |
| O1                          | -9.59                | -11.21 | -7.97 | -5.76                | -7.48  | -4.05 | -9.75                  | -11.43 | -8.08 | -6.23                  | -8.07  | -4.40 |
| Pz                          | 2.04                 | 0.43   | 3.66  | 2.45                 | 0.74   | 4.17  | 2.23                   | 0.56   | 3.91  | 2.40                   | 0.56   | 4.24  |
| Oz                          | -6.79                | -8.41  | -5.17 | -3.53                | -5.25  | -1.82 | -6.96                  | -8.63  | -5.29 | -4.06                  | -5.90  | -2.22 |
| P4                          | -0.47                | -2.09  | 1.15  | 0.32                 | -1.40  | 2.03  | 0.48                   | -1.20  | 2.15  | 1.03                   | -0.81  | 2.87  |
| PO4                         | -2.91                | -4.53  | -1.29 | -0.79                | -2.51  | 0.92  | -2.65                  | -4.32  | -0.97 | -0.79                  | -2.63  | 1.05  |
| O2                          | -9.83                | -11.45 | -8.22 | -6.04                | -7.75  | -4.32 | -9.15                  | -10.83 | -7.95 | -6.12                  | -7.96  | -4.28 |
| Intercept                   | 8.19                 | 4.62   | 11.77 | 6.93                 | 3.35   | 10.51 | 4.87                   | 1.79   | 7.47  | 3.11                   | 0.18   | 6.04  |
| <b>Random effects</b>       | $\sigma^2$           |        |       | $\sigma^2$           |        |       | $\sigma^2$             |        |       | $\sigma^2$             |        |       |
| Intercept                   | 36.46                | 20.60  | 64.53 | 35.61                | 20.07  | 63.17 | 24.85                  | 13.90  | 44.44 | 20.35                  | 11.20  | 36.97 |
| Error                       | 34.13                | 30.88  | 37.74 | 38.27                | 34.62  | 42.31 | 36.49                  | 33.01  | 40.34 | 43.99                  | 39.79  | 48.64 |

*Note.* <sup>1</sup>Set 1 vs. Set 2. <sup>2</sup>Developmental language disorder (DLD) vs. typically developing (TD). <sup>3</sup>Match vs. mismatch. <sup>4</sup>Reference electrode (Site 1) is P3,  $N = 27$ , observations = 800. Effects with 95% confidence intervals (CI) that do not include 0 are statistically significant at  $\alpha = 0.05$ . Significant differences are observed between word learning sets and, within the RRCR/022 condition, trial type fixed effects across the ROI. IR = immediate retrieval; RRCR = repeated retrieval with contextual reinstatement.
