# Supplementary material
Source: publisher figshare collection journal article supplement (https://asha.figshare.com/articles/dataset/_/7927112)
Supplement: Supplementary file 4 [file 1]

**Supplemental Material S5.** Event-related brain potential (ERP) between-condition mixed-effect model with region of interest (ROI) electrodes.

| <b>Difference waves 500–700 ms</b> |     |            |               |
|------------------------------------|-----|------------|---------------|
| <b>Fixed effects</b>               |     | <b>b</b>   | <b>95% CI</b> |
| Set <sup>1</sup>                   |     | 3.58       | 2.56 4.59     |
| Group <sup>2</sup>                 |     | 1.36       | -1.70 4.41    |
| Learning condition <sup>3</sup>    |     | 4.59       | 3.20 5.98     |
| Group × Learning Condition         |     | -0.34      | -2.30 1.63    |
| Electrode site <sup>4</sup>        |     |            |               |
|                                    | PO3 | -0.08      | -2.05 1.88    |
|                                    | O1  | -0.65      | -2.61 1.31    |
|                                    | Pz  | 0.77       | -1.19 2.73    |
|                                    | Oz  | -0.39      | -2.35 1.57    |
|                                    | P4  | 0.93       | -1.03 2.89    |
|                                    | PO4 | 0.29       | -1.67 2.25    |
|                                    | O2  | -0.60      | -2.56 1.36    |
| Intercept                          |     | -6.35      | -8.95 -3.75   |
| <b>Random effects</b>              |     | $\sigma^2$ |               |
| Intercept                          |     | 12.87      | 6.85 24.17    |
| Error                              |     | 50.11      | 45.32 55.40   |

*Note.* <sup>1</sup>Set 1 vs. Set 2. <sup>2</sup>Developmental language disorder (DLD) vs. typically developing (TD). <sup>3</sup>Repeated retrieval with contextual reinstatement (RRCR) vs. immediate retrieval (IR). <sup>4</sup>Reference electrode (Site 1) is P3,  $N = 27$ , observations = 800. Effects with 95% confidence intervals (CI) that do not include 0 are statistically significant at  $\alpha = 0.05$ . Across the ROI, there is a significant fixed effect of learning condition, with a larger N400 elicited in the RRCR/022 condition relative to the IR/000 condition, and a significant fixed effect of set.
