# Supplementary material
Source: publisher figshare collection journal article supplement (https://asha.figshare.com/articles/dataset/_/7927112)
Supplement: Supplementary file 5 [file 1]

**Supplemental Material S3.** Additional model results for the meaning outcome.

| <b>Fixed effects</b>   | <b>Model E</b> |        |       | <b>Model F</b> |        |       |
|------------------------|----------------|--------|-------|----------------|--------|-------|
|                        | b              | 95% CI |       | b              | 95% CI |       |
| Group (DLD vs. TD)     | -1.63          | -3.26  | 0.01  | -1.69          | -3.77  | 0.40  |
| Condition (022 vs 000) | 0.75           | -0.52  | 2.02  | 0.75           | -0.53  | 2.03  |
| Time (1wk vs. 5min)    | 0.31           | -0.58  | 1.21  | 0.31           | -0.58  | 1.20  |
| Group × Time           | -0.69          | -1.96  | 0.58  | -0.69          | -1.95  | 0.57  |
| Cond. × Time           | -0.69          | -1.96  | 0.58  | -0.69          | -1.95  | 0.57  |
| Group × Cond.          | -0.06          | -1.86  | 1.73  | -0.06          | -1.87  | 1.74  |
| Group × Cond. × Time   | 1.06           | -0.73  | 2.86  | 1.06           | -0.72  | 2.84  |
| PPVT-4                 |                |        |       | -0.01          | -0.08  | 0.06  |
| Mother’s education     |                |        |       | 0.09           | -0.41  | 0.59  |
| Intercept              | 10.44          | 9.28   | 11.59 | 10.07          | -0.11  | 20.24 |
| <b>Random effects</b>  | $\sigma^2$     |        |       | $\sigma^2$     |        |       |
| Condition              | 3.35           | 1.49   | 7.56  | 3.47           | 1.57   | 7.69  |
| Intercept              | 3.89           | 2.06   | 7.33  | 4.23           | 2.23   | 8.03  |

*Note.*  $N = 32$ , observations = 128. Effects with 95% confidence intervals (CI) that do not include 0 are statistically significant at  $\alpha = 0.05$ . Parameters are equivalent in some cases due to identical outcome mean values for different combinations of independent variable values. Given that the interactions of group, time, and learning condition are not significant, the more parsimonious models that identify a significant fixed effect of group are presented in Table 4 within the main text. DLD = developmental language disorder; TD = typically developing; Cond. = condition; PPVT-4 = Peabody Picture Vocabulary Test–Fourth Edition (PPVT-4; Dunn & Dunn, 2007).

**Reference**

Dunn, L., & Dunn, D. (2007). *Peabody Picture Vocabulary Test–Fourth Edition (PPVT-4)*. Minneapolis, MN: AGS/Pearson.
